# Supplementary material for: A homogeneous high-DAR antibody–drug conjugate platform combining THIOMAB antibodies and XTEN polypeptides
Source: Royal Society of Chemistry journal article supplement (doi:10.1039/d1sc05243h), 2022-01-01
Supplement: d1sc05243h1.pdf [file d1sc05243h1.pdf]

1 **Supporting Information**

2

3 **Synthesis of linker-payloads**

4

5 **Synthesis of iodoacetamido-PEG3-SCO:**

6

7

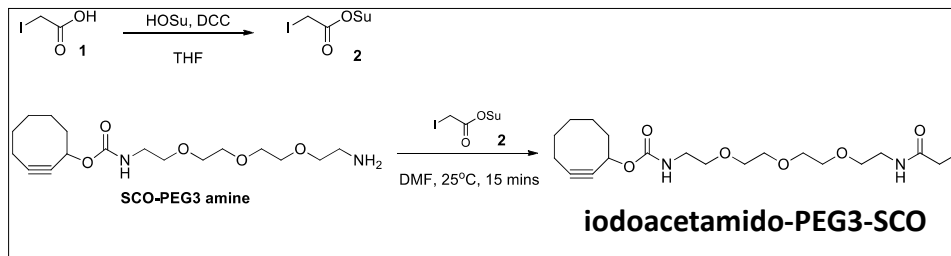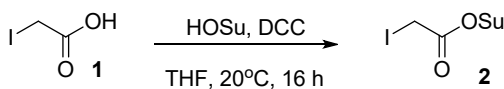

12 To a mixture of 2-iodoacetic acid (1.0 g, 5.38 mmol) in anhydrous THF (25 mL) was added *N*-hydroxysuccinimide  
13 (HOSu, 0.68 g, 5.92 mmol), followed by *N,N*-dicyclohexylcarbodiimide (DCC, 1.22 g, 5.92 mmol). The reaction  
14 mixture was stirred at 20 °C for 16 h. The mixture was filtered, and the filtrate was concentrated to afford 2,5-  
15 dioxopyrrolidin-1-yl 2-iodoacetate as yellow solid (**2**, 1.52 g, 100%). <sup>1</sup>HNMR (400MHz, CDCl<sub>3</sub>) δ 3.95 (s, 2H), 2.86 (s,  
16 4H).

17

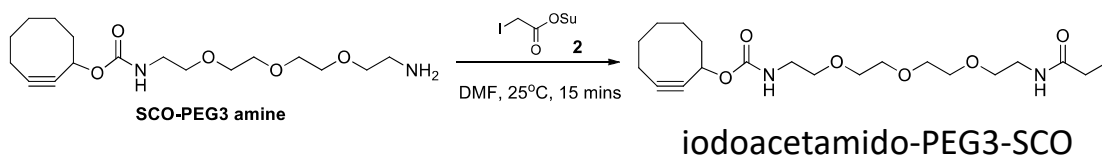

19 To a solution of **SCO-PEG3 amine** (SiChem, 70.0 mg, 0.20 mmol) in DMF (3 mL) was added 2,5-dioxopyrrolidin-1-yl  
20 2-iodoacetate (**2**, 87 mg, 0.31mmol). The mixture was stirred at 25 °C for 15min. The mixture was purified by  
21 reverse phase chromatography (acetonitrile 25-55/0.225% FA in water) to afford **iodoacetamido-PEG3-SCO** as a  
22 pale yellow oil (35.2 mg, 33.3%). <sup>1</sup>H NMR (400MHz, CDCl<sub>3</sub>) δ 6.82 (brs, 1H), 5.31 (brs, 2H), 3.73 - 3.71 (m, 2H), 3.66-

23 3.64 (m, 8H), 3.60 - 3.55 (m, 4H), 3.49-3.66 (m, 2H), 3.38 - 3.36 (m, 2H), 2.25 - 2.16 (m, 3H), 1.92 - 1.87 (m, 4H),  
 24 1.68 - 1.65 (m, 2H), 1.57 - 1.48 (m, 1H). LCMS (5-95, AB, 1.5min):  $R_T$  (220/254nm) = 0.880 min,  $m/z$  = 511.1[M+H]<sup>+</sup>.

25 **Synthesis of azidoacetamido-PEG4-Val-Ala-PAB-PBD<sub>ma</sub>**

26

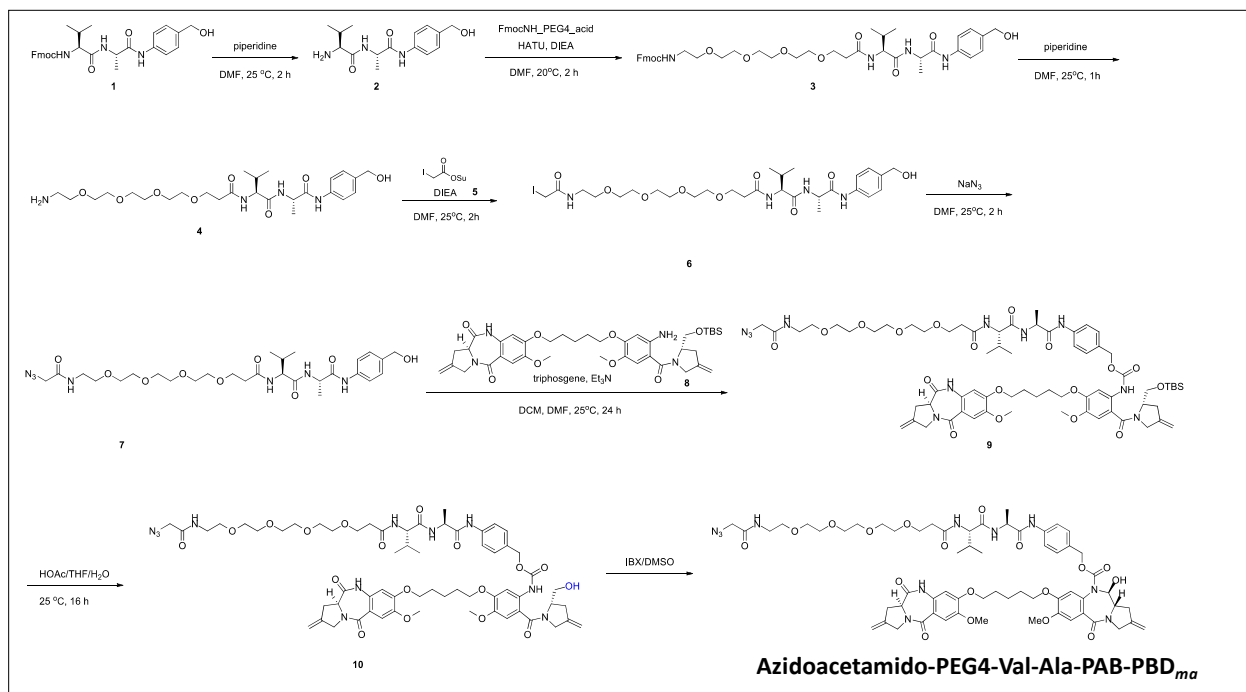

27

28

29

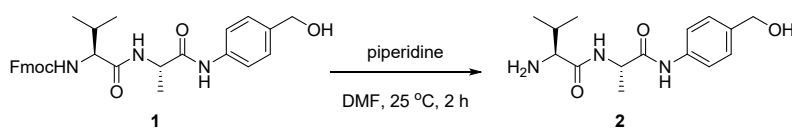

30

31

32 To a solution of (9H-fluoren-9-yl)methyl((S)-1-(((S)-1-((4-(hydroxymethyl) phenyl)amino)-1-oxopropan-2-yl)amino)-  
 33 3-methyl-1-oxobutan-2-yl)carbamate (**1**, 750.0 mg, 1.45 mmol) in DMF (20 mL) was added piperidine (0.2 mL, 1.45  
 34 mmol), the mixture was stirred at 25°C for 2h. The mixture was concentrated and washed with methyl tertiary  
 35 butyl ether (20 mL x 3), the precipitate was collected to afford (S)-2-amino-N-(((S)-1-((4-  
 36 (hydroxymethyl)phenyl)amino)-1-oxopropan-2-yl)-3-methylbutanamide as a white solid (**2**, 400 mg, 93.7%), which  
 37 was used in next step directly.

38

39

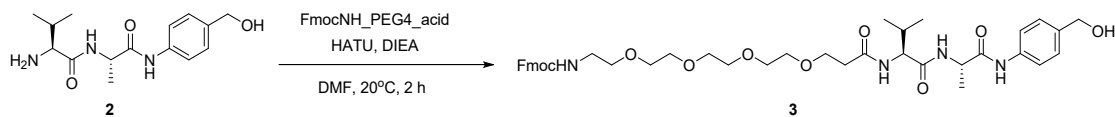

40  
41

42 To a mixture of 1-(9H-fluoren-9-yl)-3-oxo-2,7,10,13,16-pentaoxa-4-azanodecan-19-oic acid (**FmocNH-PEG4-acid**,  
43 Broadpharm, 797.7 mg, 1.64 mmol) in anhydrous N,N-dimethylformamide (20 mL) was added 2-(7-  
44 Azabenzotriazol-1-yl)-N,N,N',N'-tetramethyluronium hexafluorophosphate (HATU, 622.2 mg, 1.64 mmol), followed  
45 by N,N-Diisopropylethylamine (DIEA, 528.7 mg, 4.09 mmol). The reaction solution was stirred at 20 °C for 10 min.  
46 Then (S)-2-amino-N-((S)-1-((4-(hydroxymethyl) phenyl)amino)-1-oxopropan-2-yl)-3-methylbutanamide (**2**, 400.0  
47 mg, 1.36 mmol) was added. The reaction mixture was stirred at 20°C for 2h. TLC (10% MeOH in DCM, R<sub>f</sub> = 0.4)  
48 showed the reaction had gone completion. The mixture was concentrated to afford crude product which was  
49 purified by flash chromatography eluting with 0-10% MeOH in DCM to afford (9H-fluoren-9-yl)methyl ((17S,20S)-  
50 21-((4-(hydroxymethyl)phenyl)amino)-17-isopropyl-20-methyl-15,18,21-trioxo-3,6,9,12-tetraoxa-16,19-  
51 diazahenicosyl)carbamate as a yellow solid (**3**, 500 mg, 35.5%). LCMS (5-95, AB, 1.5min): R<sub>T</sub> = 0.794 min, m/z =  
52 785.3[M+Na]<sup>+</sup>.

53

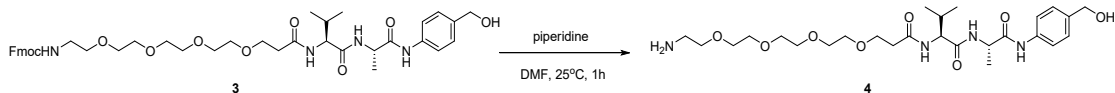

54

55 A solution of (9H-fluoren-9-yl)methyl ((17S,20S)-21-((4-(hydroxymethyl)phenyl)amino)-17-isopropyl-20-methyl-  
56 15,18,21-trioxo-3,6,9,12-tetraoxa-16,19-diazahenicosyl)carbamate (**3**, 500.0 mg, 0.66 mmol) and piperidine (1.0  
57 mL, 10.92mmol) in DMF (5 mL) was stirred at 25°C for 1h. The solvent were concentrated in vacuo, the residue  
58 was washed with methyl tertiary-butyl ether (10 mL x 3), and the filtered cake was dried in vacuo to afford 1-  
59 amino-N-((S)-1-(((S)-1-((4-(hydroxymethyl)phenyl)amino)-1-oxopropan-2-yl)amino)-3-methyl-1-oxobutan-2-yl)-  
60 3,6,9,12-tetraoxapentadecan-15-amide (**4**, 350 mg, 98.8%) as a white solid. LCMS (5-95, AB, 1.5min): RT = 0.567  
61 min, m/z = 541.3[M+H]<sup>+</sup>.

62

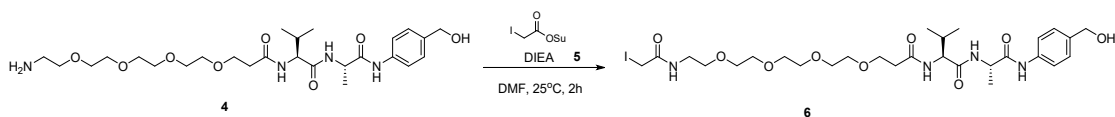

63

64 To a mixture of 2,5-dioxopyrrolidin-1-yl 2-iodoacetate (**5**, 267 mg, 0.94 mmol) in anhydrous N,N-  
65 dimethylformamide (15 mL) was added 1-amino-N-((S)-1-(((S)-1-((4-(hydroxymethyl)phenyl)amino)-1-oxopropan-2-

66 yl)amino)-3-methyl-1-oxobutan-2-yl)-3,6,9,12-tetraoxapentadecan-15-amide (**4**, 340.0 mg, 0.63 mmol). The  
 67 reaction mixture was stirred at 25°C for 2h. The mixture was concentrated to afford crude *N*-((*S*)-1-(((*S*)-1-(4-  
 68 (hydroxymethyl)phenyl)amino)-1-oxopropan-2-yl)amino)-3-methyl-1-oxobutan-2-yl)-1-(2-iodoacetamido)-3,6,9,12-  
 69 tetraoxapentadecan-15-amide (**6**, 445 mg, theoretical yield) as a yellow solid which was used in next step directly.  
 70 LCMS (5-95, AB, 1.5min): RT = 0.642 min, m/z = 731.2[M+Na]<sup>+</sup>.

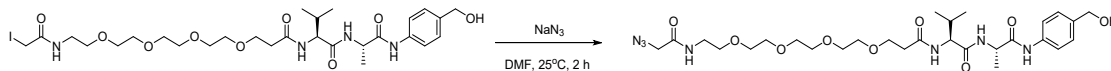

71

6

7

72 To a solution of *N*-((*S*)-1-(((*S*)-1-(4-(hydroxymethyl)phenyl)amino)-1-oxopropan-2-yl) amino)-3-methyl-1-oxobutan-  
 73 2-yl)-1-(2-iodoacetamido)-3,6,9,12-tetraoxapentadecan-15-amide (**6**, 445.0 mg, 0.63 mmol) in *N,N*-  
 74 Dimethylformamide (15 mL) was added sodium azide (120.0 mg, 1.85 mmol). The formed mixture was stirred at  
 75 25°C for 2h. TLC (10% MeOH in DCM, R<sub>f</sub> = 0.4) showed the reaction had gone to completion. Then most of *N,N*-  
 76 dimethylformamide was removed and methyl tertiary butyl ether (15 mL) was added to the mixture, and the  
 77 precipitate was collected and washed with methyl tertiary butyl ether (5 mL x 2), the filter cake was purified by  
 78 flash chromatography eluting with 0-10% MeOH in DCM to afford 1-(2-azidoacetamido)-*N*-((*S*)-1-(((*S*)-1-(4-  
 79 (hydroxymethyl)phenyl)amino)-1-oxopropan-2-yl)amino)-3-methyl-1-oxobutan-2-yl)-3,6,9,12-tetraoxapentadecan-  
 80 15-amide (**7**, 360 mg, 89.2%) as a yellow solid. LCMS (5-95, AB, 1.5min): R<sub>T</sub> = 0.773 min, m/z = 646.1 [M+Na]<sup>+</sup>.

81

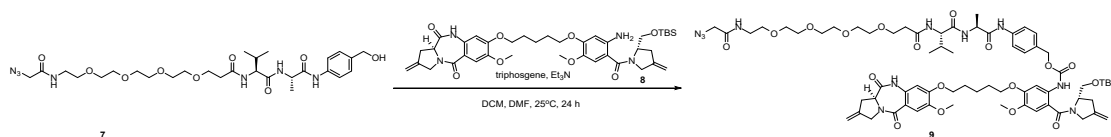

82

7

8

83 To a mixture of triphosgene (20.2 mg, 0.07 mmol) and 4 Å MS (100 mg) in anhydrous dichloromethane (4 mL) was  
 84 added a solution of (6*aS*)-3-[5-[5-amino-4-((2*S*)-2-[[*tert*-butyl(dimethyl)silyl]oxymethyl]-4-methylene-pyrrolidine-1-  
 85 carbonyl]-2-methoxy-phenoxy]pentoxy]-2-methoxy-8-methylene-5,6*a*,7,9-tetrahydropyrrolo[2,1-  
 86 *c*][1,4]benzodiazepine-6,11-dione (**8**, 50.0 mg, 0.07 mmol) and trimethylamine (21 mg, 0.20 mmol) in anhydrous  
 87 dichloromethane (4 mL). The reaction mixture was stirred at 25 °C for 0.5h. The mixture was concentrated in  
 88 vacuo to give the crude product which was used for the next step directly.

89 To a solution of (2*S*)-2-[3-[2-[2-[2-[2-((2-azidoacetyl)amino)ethoxy]ethoxy] ethoxy]ethoxy]propanoylamino]-*N*-[(1*S*)-  
 90 2-[4-(hydroxymethyl)anilino]-1-methyl-2-oxo-ethyl]-3-methyl-butanamide (**7**, 41.8 mg, 0.07 mmol) and 4A  
 91 molecular sieves in DCM (5 mL) was added a solution of triethylamine (20.4 mg, 0.20 mmol) and the above product

92 (51.0 mg, 0.07 mmol) in DMF (5 mL). The mixture was stirred at 25 °C for 24h. The mixture was filtered,  
 93 concentrated and purified by preparative TLC (10% MeOH in DCM, R<sub>f</sub> = 0.5) to give 4-[[[(2S)-2-[[[(2S)-2-[3-[2-[2-[2-  
 94 [2-[(2-azidoacetyl)amino]ethoxy]ethoxy]ethoxy]ethoxy] propanoylamino]-3-methyl-  
 95 butanoyl]amino]propanoyl]amino]phenyl]methyl N-[5-[5-[[[(6aS)-2-methoxy-8-methylene-6,11-dioxo-5,6a,7,9-  
 96 tetrahydropyrrolo[2,1-c][1,4]benzodiazepin-3-yl]oxy]pentoxy]-2-[(2S)-2-[[tert-butyl(dimethyl)silyl]oxymethyl]-4-  
 97 methylene-pyrrolidine-1-carbonyl]-4-methoxy-phenyl]carbamate (**9**, 50 mg, 40.9%) as a pale yellow solid. LCMS (5-  
 98 95, AB, 1.5min): RT (220/254nm) = 1.090 min, m/z = 693.0 [M/2+H]<sup>+</sup>.

99

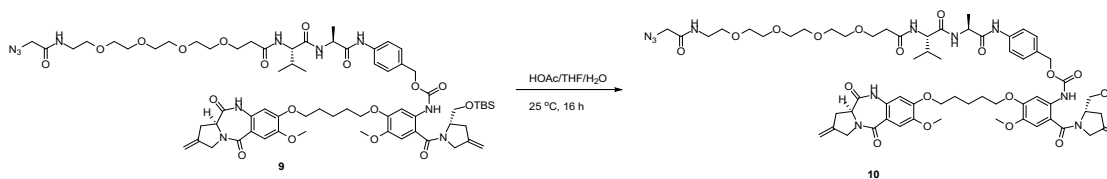

100

101 A solution of 4-((20S,23S)-1-azido-20-isopropyl-23-methyl-2,18,21-trioxo-6,9,12,15-tetraoxa-3,19,22-  
 102 triazatetracosanamido)benzyl(2-((S)-2-((tert-butyl dimethylsilyl)oxy)methyl)-4-methylenepyrrolidine-1-carbonyl)-4-  
 103 methoxy-5-((5-(((S)-7-methoxy-2-methylene-5,11-dioxo-2,3,5,10,11,11a-hexahydro-1H-benzo[e]pyrrolo[1,2-a][1,4]  
 104 diazepin-8-yl)oxy)pentyl)oxy)phenyl)carbamate (**9**, 50.0 mg, 0.04 mmol) in THF (1.0 mL), water (1.0 mL) and acetic  
 105 acid (HOAc, 1.5mL) was stirred at 25 °C for 16h. The mixture was concentrated to give the product 4-((20S,23S)-1-  
 106 azido-20-isopropyl-23-methyl-2,18,21-trioxo-6,9,12,15-tetraoxa-3,19,22-triazatetracosanamido)benzyl(2-((S)-2-  
 107 (hydroxymethyl)-4-methylenepyrrolidine-1-carbonyl)-4-methoxy-5-((5-(((S)-7-methoxy-2-methylene-5,11-dioxo-  
 108 2,3,5,10,11,11a-hexahydro-1H-benzo[e]pyrrolo[1,2-a][1,4]diazepin-8-yl)oxy)pentyl)oxy)phenyl)carbamate (**10**, 45  
 109 mg, 98.1%) as a pale yellow solid. LCMS (5-95, AB, 1.5min): RT (220/254nm) = 0.898 min, m/z = 636.0 [M/2+H]<sup>+</sup>.

110

111

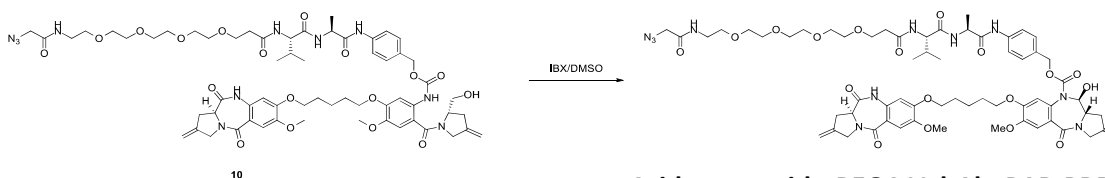

**Azidoacetamido-PEG4-Val-Ala-PAB-PBD<sub>ma</sub>**

112

113 To a solution of 4-((20S,23S)-1-azido-20-isopropyl-23-methyl-2,18,21-trioxo-6,9,12,15-tetraoxa-3,19,22-  
 114 triazatetracosanamido)benzyl(2-((S)-2-(hydroxymethyl)-4-methylenepyrrolidine-1-carbonyl)-4-methoxy-5-((5-(((S)-  
 115 7-methoxy-2-methylene-5,11-dioxo-2,3,5,10,11,11a-hexahydro-1H-benzo[e]pyrrolo[1,2-a][1,4]diazepin-8-  
 116 yl)oxy)pentyl)oxy)phenyl)carbamate (**10**, 45.0 mg, 0.04 mmol) in dimethyl sulfoxide (DMSO, 2 mL) was added IBX  
 117 (49.6 mg, 0.18 mmol). The reaction mixture was stirred at 38 °C for 24h. The mixture was purified by reverse

118 phase chromatography (acetonitrile 46-70% / 0.225% FA in water) to afford **azidoacetamido-PEG4-Val-Ala-PAB-**  
 119 **PBD<sub>ma</sub>** (6.9 mg, 15.1%) as a white solid. LCMS (10-80, AB, 7.0min): RT =3.409 min, m/z = 1290.9 [M+Na]<sup>+</sup>.

120

121 **Synthesis of azidoacetamido-PEG4-Val-Ala-PAB-dmDNA31:**

122

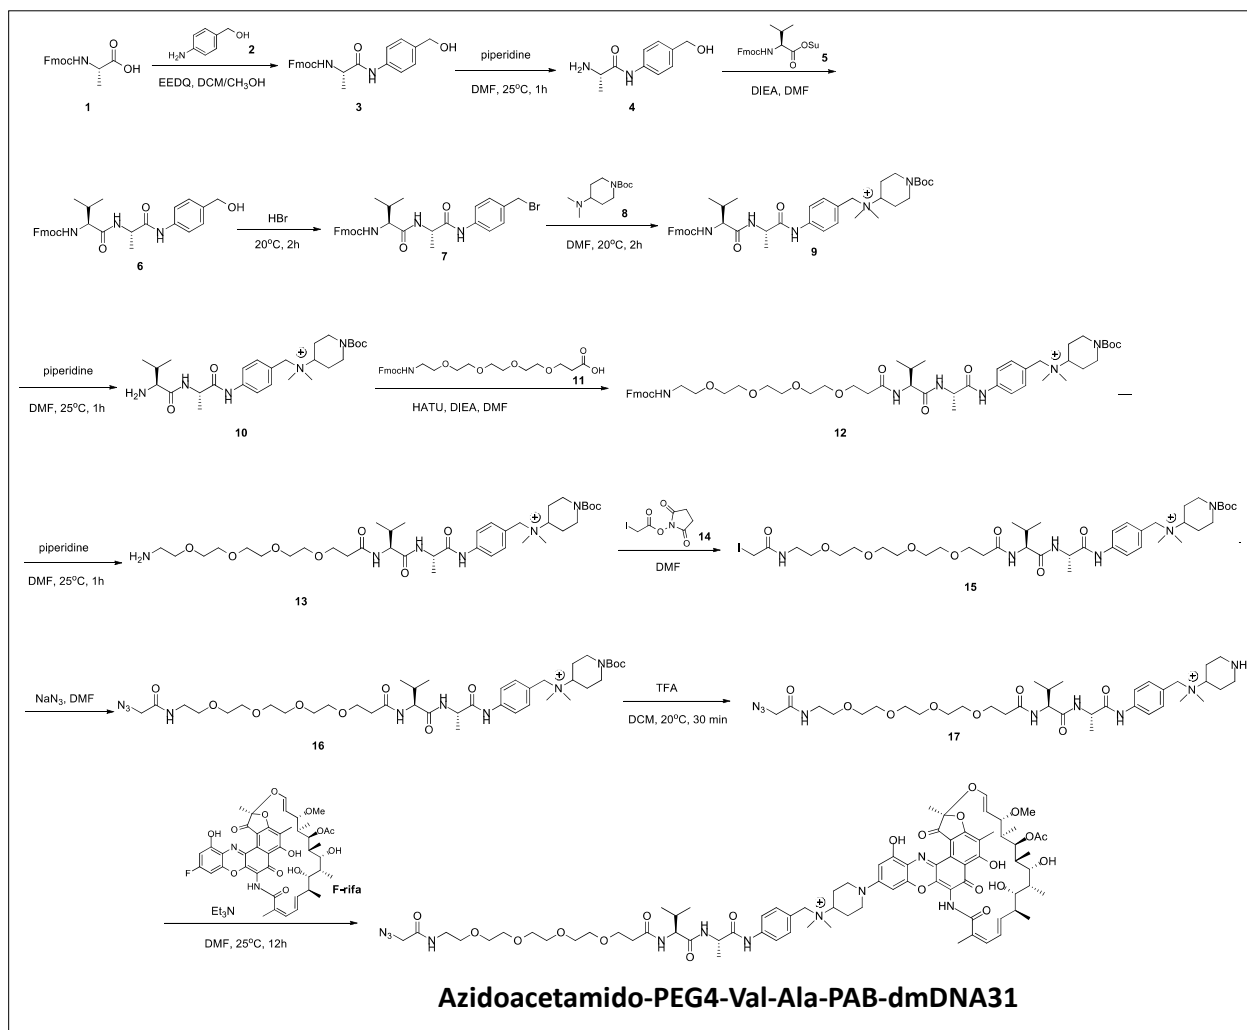

123

124

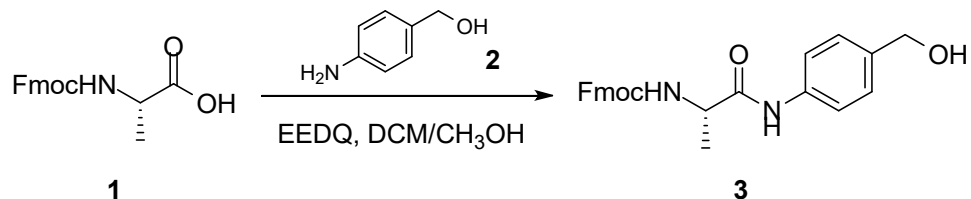

125

126 To a stirred solution of (*S*)-2-(((9*H*-fluoren-9-yl)methoxy)carbonyl)amino)propanoic acid (**1**, 2100.0 mg, 6.75mmol)  
 127 in dichloromethane (DCM, 20 mL) and MeOH (5 mL) was added 2-ethoxy-1-ethoxycarbonyl-1,2-dihydroquinoline  
 128 (EEDQ, 3336.0 mg, 13.49 mmol), after ten minutes, (4-aminophenyl)methanol (**2**, 1246.5 mg, 10.12 mmol) was

129 added. The mixture was stirred at 25 °C for 12h. The reaction mixture was concentrated to dryness and the  
 130 residue was washed by methyl tertiary butyl ether (20 mL x 3) and dried in vacuo to afford (S)-(9H-fluoren-9-  
 131 yl)methyl(1-((4-(hydroxymethyl) phenyl)amino)-1-oxopropan-2-yl) carbamate (2400 mg, 84.6%) as a white solid.  
 132 LCMS (5-95, AB, 1.5min): RT = 0.871 min, m/z = 439.1[M+Na]<sup>+</sup>. <sup>1</sup>H NMR (400MHz, Methanol-d<sub>4</sub>): δ 7.77 (d, J = 7.6  
 133 Hz, 2H), 7.66 (t, J = 8.0 Hz, 2H), 7.51 (d, J = 8.0 Hz, 2H), 7.34 (t, J = 7.6 Hz, 2H), 7.28 (d, J = 7.6 Hz, 4H), 4.36 (d, J = 6.4  
 134 Hz, 2H), 4.27 – 4.19 (m, 4H), 1.39 (d, J = 7.2 Hz, 3H).

135  
 136

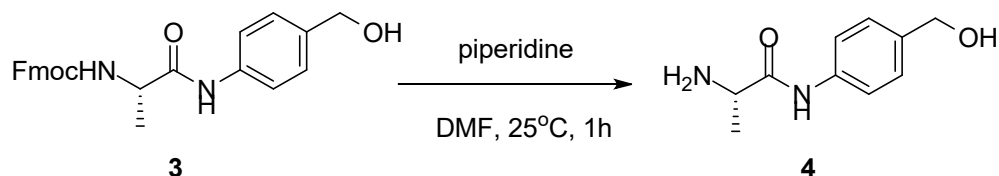

137  
 138

139 To a solution of (S)-(9H-fluoren-9-yl)methyl(1-((4-(hydroxymethyl)phenyl)amino)-1-oxopropan-2-yl)carbamate (**3**,  
 140 1000.0 mg, 2.4 mmol) in DMF (10 mL) was added piperidine (2.2 mL, 24.01 mmol). The mixture was stirred at 25  
 141 °C for 1h. The solvent was removed in vacuum. The residue was washed by methyl tertiary butyl ether (20 mL x  
 142 3), the precipitate was collected to afford (S)-2-amino-N-(4-(hydroxymethyl)phenyl)propanamide (**4**, 370 mg,  
 143 79.3%) as white solid.

144

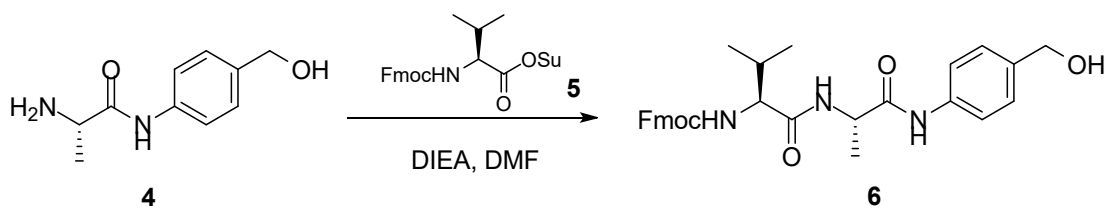

145  
 146

147 To a mixture of (S)-2,5-dioxopyrrolidin-1-yl-2-(((9H-fluoren-9-yl)methoxy)carbonyl)amino-3-methylbutanoate (**5**,  
 148 1164.0 mg, 2.67 mmol) in anhydrous DMF (20 mL) was added (S)-2-amino-N-(4-  
 149 (hydroxymethyl)phenyl)propanamide (**4**, 370.0 mg, 1.9 mmol), followed by DIEA (738.6 mg, 5.71 mmol). The  
 150 reaction mixture was stirred at 20 °C for 2 h. TLC (10 % MeOH in DCM, R<sub>f</sub> = 0.4) showed the reaction had gone to  
 151 completion. The mixture was concentrated to give the residue which was washed with methyl tertiary butyl ether  
 152 (25 mLx3) to afford (9H-fluoren-9-yl)methyl((S)-1-(((S)-1-((4-(hydroxymethyl)phenyl)amino)-1-oxopropan-2-  
 153 yl)amino)-3-methyl-1-oxobutan-2-yl)carbamate (**5**, 982 mg, 93.6%) as a white solid. LCMS (5-95, AB, 1.5min): RT =  
 154 0.885 min, m/z = 538.1[M+Na]<sup>+</sup>.

155

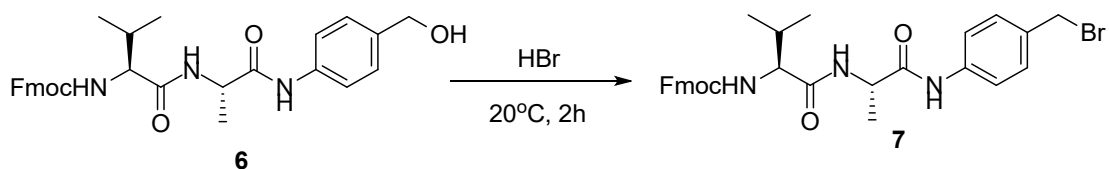

156

157

158 A mixture (9H-fluoren-9-yl)methyl((S)-1-(((S)-1-(4-(hydroxymethyl)phenyl)amino)-1-oxopropan-2-yl)amino)-3-  
 159 methyl-1-oxobutan-2-yl)carbamate (**6**, 500.0 mg, 0.97 mmol) in HBr/HOAc (8mL) was stirred at 20 °C for 2h. The  
 160 mixture was pour into ice water (30 mL), the precipitate was collected and dried in vacuum to afford (9H-fluoren-9-  
 161 yl)methyl ((S)-1-(((S)-1-(4-(bromomethyl)phenyl)amino)-1- oxopropan-2-yl)amino)-3-methyl-1-oxobutan-2-  
 162 yl)carbamate (**7**, 560 mg, 66.9%) as a whiter solid. LCMS (5-95, AB, 1.5min): RT = 0.857 min, m/z = 579.9  
 163 [M+2+H]<sup>+</sup>.

164

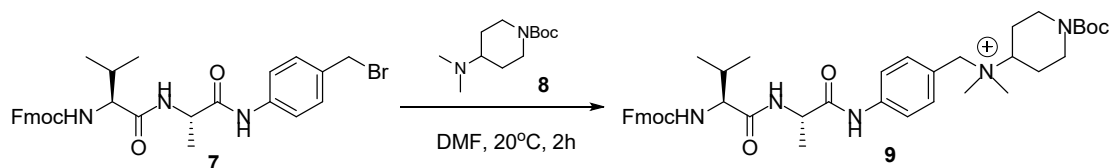

165

166

167 To a solution of (9H-fluoren-9-yl)methyl((S)-1-(((S)-1-(4-(bromomethyl)phenyl)amino)-1-oxopropan-2-yl)amino)-3-  
 168 methyl-1-oxobutan-2-yl)carbamate (**7**, 560.0 mg, 0.97 mmol) in DMF (5 mL) was added tert-butyl 4-  
 169 (dimethylamino)piperidine-1-carboxylate (**8**, 221.0 mg, 0.97 mmol). The mixture was stirred at 20 °C for 2h. The  
 170 mixture was concentrated to give the crude N-(4-((S)-2-((S)-2-(((9H-fluoren-9-yl)methoxy)carbonyl)amino)-3-  
 171 methylbutanamido)propanamido)benzyl)-1-(tert-butoxycarbonyl)-N,N-dimethylpiperidin-4-aminium salt (**9**, 700  
 172 mg, 96.5%) as a white solid, which was used for the next step directly. LCMS (5-95, AB, 1.5min): RT = 0.917 min,  
 173 m/z = 726.3 [M]<sup>+</sup>.

174

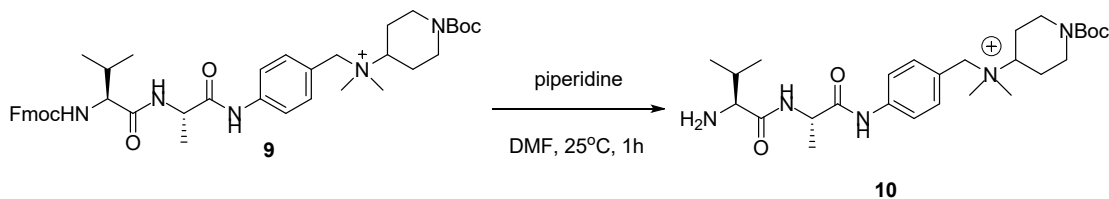

175

176

177 To a solution of N-(4-((S)-2-((S)-2-(((9H-fluoren-9-yl)methoxy)carbonyl)amino)-3-  
 178 methylbutanamido)propanamido)benzyl)-1-(tert-butoxycarbonyl)-N,N-dimethylpiperidin-4-aminium salt (**9**, 600.0  
 179 mg, 0.83 mmol) in DMF (5 mL) was added piperidine (0.76 mL, 8.25mmol). The mixture was stirred at 20 °C for 1h.  
 180 The solvent was removed in vacuum. Then more DMF (10 mL×2) was added and concentrated. The formed



181 residue was washed by methyl tertiary butyl ether (20 mL x 3) and dried in vacuo to afford *N*-(4-((*S*)-2-((*S*)-2-amino-  
182 3-methylbutanamido)propanamido)benzyl)-1-(*tert*-butoxycarbonyl)-*N,N*-dimethylpiperidin-4-aminium salt (**10**, 315  
183 mg, 75.6%) as a white solid.

184

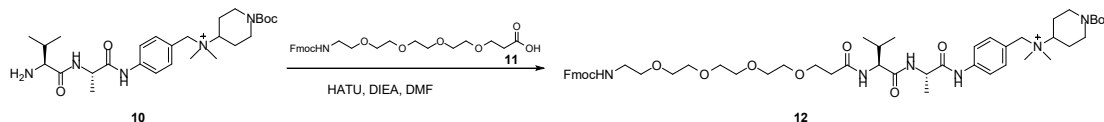

185

186 To a solution of 1-(9*H*-fluoren-9-yl)-3-oxo-2,7,10,13,16-pentaoxa-4-azanodecan-19-oic acid (**11**, Broadpharm,  
187 365.2 mg, 0.75 mmol ) in anhydrous DMF (5 mL) was added HATU (284.8 mg, 0.75 mmol), followed by DIEA (242  
188 mg, 1.87 mmol). The reaction solution was stirred at 20 °C for 10 min. Then *N*-(4-((*S*)-2-((*S*)-2-amino-3-  
189 methylbutanamido)propanamido)benzyl)-1-(*tert*-butoxycarbonyl)-*N,N*-dimethylpiperidin-4-aminium salt (**10**, 315.0  
190 mg, 0.62 mmol) was added. The reaction mixture was stirred at 20 °C for 2h. The mixture was concentrated in  
191 vacuo to afford crude product which was purified by reverse HPLC (acetonitrile 42 - 52%/0.225% FA in water) to  
192 afford *N*-(4-((21*S*,24*S*)-1-(9*H*-fluoren-9-yl)-21- isopropyl-24-methyl-3,19,22-trioxa-2,7,10,13,16-pentaoxa-4,20,23-  
193 triazapentacosanamido)benzyl)-1-(*tert*-butoxycarbonyl)-*N,N*-dimethylpiperidin-4-aminium salt (**12**, 315 mg, 44%)  
194 as a white solid. LCMS (5-95, AB, 1.5min): RT =0.740 min, m/z = 973.4[M+H]<sup>+</sup>.

195

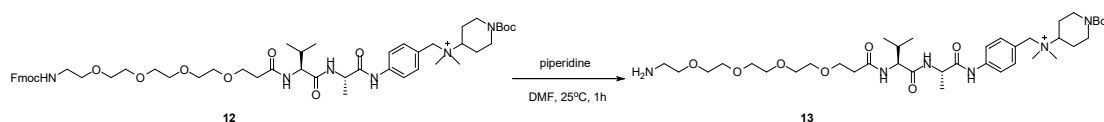

196

197

198 To a solution of *N*-(4-((21*S*,24*S*)-1-(9*H*-fluoren-9-yl)-21- isopropyl-24-methyl-3,19,22-trioxa-2,7,10,13,16-pentaoxa-  
199 4,20,23-triazapentacosanamido)benzyl)-1-(*tert*-butoxycarbonyl)-*N,N*-dimethylpiperidin-4-aminium salt (**12**, 315.0  
200 mg, 0.32 mmol) in DMF ( 5mL) was added piperidine (0.3 mL, 3.23 mmol). The mixture was stirred at 25 °C for 1h.  
201 The solvent was removed in vacuum, and more DMF (5 mL x 2) was added and concentrated. The residue was  
202 washed by methyl tertiary butyl ether (10 mL x 3) and dried in vacuo to afford *N*-(4-((17*S*,20*S*)-1-amino-17-  
203 isopropyl-20-methyl-15,18-dioxo-3,6,9,12-tetraoxa-16,19-diazahenicosanamido)benzyl)-1-(*tert*-butoxycarbonyl)-  
204 *N,N*-dimethylpiperidin-4-aminium salt (**13**, 175 mg, 72%) as a white solid.

205

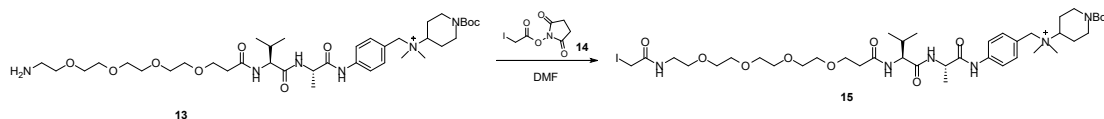

206

207

208 To a solution of *N*-(4-((17*S*,20*S*)-1-amino-17-isopropyl-20-methyl-15,18-dioxo- 3,6,9,12-tetraoxa-16,19-  
209 diazahenicosanamido)benzyl)-1-(*tert*-butoxycarbonyl)-*N,N*-dimethylpiperidin-4-aminium salt (**13**, 165.0 mg, 0.22

210 mmol) in anhydrous DMF (4 mL) was added 2,5-dioxypyrrolidin-1-yl 2-iodoacetate (**14**, 93.2 mg, 0.33 mmol). The  
 211 reaction mixture was stirred at 20 °C for 2h. The mixture was filtered, and the filtrate was concentrated to afford  
 212 the crude 1-(tert-butoxycarbonyl)-N-(4-((20S,23S)-1-iodo-20-isopropyl-23-methyl-2,18,21-trioxo-6,9,12,15-  
 213 tetraoxa-3,19,22-triazatetracosanamido)benzyl)-N,N-dimethylpiperidin-4-aminium salt (**15**, 200 mg, 64.2%) as a  
 214 yellow solid, which was used for the next step directly. LCMS (5-95, AB, 1.5min): RT = 0.798 min, m/z = 919.6 [M]<sup>+</sup>.  
 215

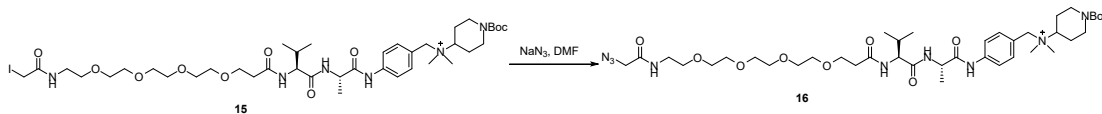

216  
 217

218 To a solution of 1-(tert-butoxycarbonyl)-N-(4-((20S,23S)-1-iodo-20-isopropyl-23-methyl-2,18,21-trioxo-6,9,12,15-  
 219 tetraoxa-3,19,22-triazatetracosanamido)benzyl)-N,N-dimethylpiperidin-4-aminium salt (**15**, 200.0 mg, 0.22 mmol)  
 220 in DMF (4 mL) was added sodium azide (NaN<sub>3</sub>, 8.1 mg, 0.12 mmol). Then the mixture was stirred at 25 °C for 2h.  
 221 The mixture was purified by HPLC (acetonitrile 20 - 50% / 0.1% TFA in water) to give N-(4-((20S,23S)-1-azido-20-  
 222 isopropyl-23-methyl-2,18,21-trioxo-6,9,12,15-tetraoxa-3,19,22-triazatetracosanamido)benzyl)-1-(tert-  
 223 butoxycarbonyl)-N,N-dimethylpiperidin-4-aminium salt (**16**, 50 mg, 27.5%) as a white solid. LCMS (5-95, AB,  
 224 1.5min): RT = 0.635 min, m/z = 834.4 [M]<sup>+</sup>.  
 225

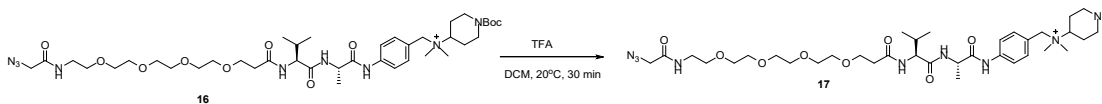

226  
 227

228 To a mixture of N-(4-((20S,23S)-1-azido-20-isopropyl-23-methyl-2,18,21-trioxo-6,9,12,15-tetraoxa-3,19,22-  
 229 triazatetracosanamido)benzyl)-1-(tert-butoxycarbonyl)-N,N-dimethylpiperidin-4-aminium salt (**16**, 50.0 mg, 0.06  
 230 mmol) in anhydrous dichloromethane (2 mL) was added 50% trifluoroacetic acid (TFA) in DCM (2 mL, v/v). The  
 231 reaction mixture was stirred at 20 °C for 30 min. The mixture was concentrated in vacuo and washed with methyl  
 232 tertiary butyl ether (2 mL x 3) to afford N-(4-((20S,23S)-1-azido-20-isopropyl-23-methyl-2,18,21-trioxo-6,9,12,15-  
 233 tetraoxa-3,19,22-triazatetracosanamido)benzyl)-N,N-dimethylpiperidin-4-aminium salt (**17**, 40 mg, 90.9%) as a  
 234 yellow solid.  
 235

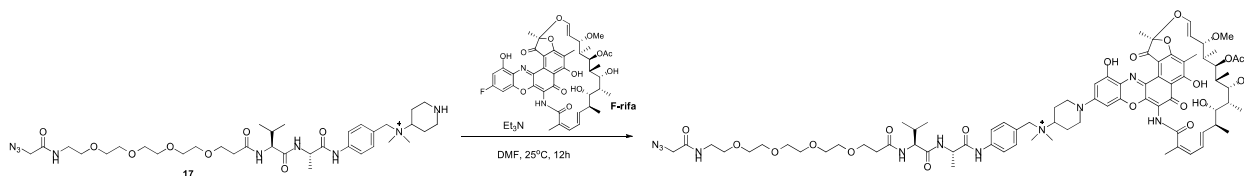

**Azidoacetamido-PEG4-Val-Ala-PAB-dmDNA31**

236

237

238 To a mixture of **F-rifa** (53.55 mg, 0.07 mmol) and triethylamine (16.5 mg, 0.16 mmol) in DMF (2 mL) was added *N*-  
239 (4-((20*S*,23*S*)-1-azido-20-isopropyl -23-methyl-2,18,21-trioxo-6,9,12,15-tetraoxa-3,19,22-  
240 triazatetracosanamido)benzyl)-*N,N*-dimethylpiperidin-4-aminium salt (**17**, 40.0 mg, 0.05 mmol). The mixture was  
241 stirred for 12 hours at 25 °C. Then the mixture was filtered and the filtrate was purified by reverse HPLC  
242 (acetonitrile 33-63/0.225%FA in water) to afford **azido-PEG4-Val-Ala-PAB-dmDNA31** (37mg, 44.3%) as a blue solid.  
243 LCMS (5-95, AB, 1.5min): RT = 0.923 min, m/z = 750.9 [(M-MeOH)/2+H]<sup>+</sup>. HRMS (5-95, AB, 4 Min): m/z =  
244 1532.7647 [M]<sup>+</sup>.
